# Supplementary material
Source: HighWire-hosted journal article supplement (https://qdcxjkg.com/highwire/filestream/129855/field_highwire_adjunct_files/0/ERJ-01601-2015_supplementary_material.pdf)
Supplement: ERJ-01601-2015_supplementary_material.pdf [file ERJ-01601-2015_supplementary_material.pdf]

## **Multicenter standardization of chest CT in children and adolescents with CF: The way forward**

Wieying Kuo<sup>1,2</sup>, Mariette P.C. Kemner-van de Corput<sup>2</sup>, Adria Perez-Rovira<sup>1,3</sup>, Marleen de Bruijne<sup>3,4</sup>, Isabelle Fajac<sup>5,6</sup>, Harm A.W.M. Tiddens<sup>1,2</sup>, Marcel van Straten<sup>2</sup> on behalf of the ECFS-CTN/ SCIFI CF study group\*.

Online Data Supplement

## MATERIAL AND METHODS

All centers were asked to complete a questionnaire (fig. S1)

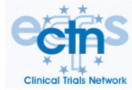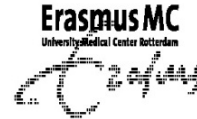

### QUESTIONNAIRE SCIFI-CF

Name of CF-center

Total number of CF patients between 0-5:

Diagnosis through Newborn Screening:

Total number of patients between 5 and 18 years:

Total number of adults:

Describe current use of chest CT in your center:

When using routinely, what is the age of first chest CT?

Additional comments in relation to chest CT routine .....  
.....  
.....

For young children ... yrs what CT protocol is used

- General anaesthesia + Pressure controlled expiration 0 cm H<sub>2</sub>O  
And / Or
- General anaesthesia + pressure controlled inspiration ..... cm H<sub>2</sub>O  
And / Or
- Spontaneous breathing with sedation

For expiratory CT in children  $\geq$  ... is used: Voluntary breath hold/ Spirometer controlled

For inspiratory CT in children  $\geq$  ... is used: Voluntary breath hold/ Spirometer controlled

Which scan protocol is used for expiratory scan: Volumetric or limited slices

Which scan protocol is used for inspiratory scan: Volumetric or limited slices

Figure S1. Questionnaire sent to all 30 ECFS-CTN centers for inventory and participation with the SCIFI CF initiative.
